# Supplementary material for: Erasure and reestablishment of random allelic expression imbalance after epigenetic reprogramming
Source: RNA. 2016 Oct;22(10):1620–30. doi: 10.1261/rna.058347.116 (PMC5029458; doi:10.1261/rna.058347.116)
Supplement: Supplemental Material [file supp_058347.116_Supplemental_File2.xlsx]

## Sheet: SPC01 MA genes
LRRC3	leucine rich repeat containing 3
TTC22	tetratricopeptide repeat domain 22
MCTP2	multiple C2 domains, transmembrane 2
ABCC8	ATP binding cassette subfamily C member 8
TRHR	thyrotropin releasing hormone receptor
TMEM235	transmembrane protein 235
LAMA3	laminin subunit alpha 3
PSORS1C1	psoriasis susceptibility 1 candidate 1
TSPEAR	thrombospondin-type laminin G domain and EAR repeats
C1QL3	complement component 1, q subcomponent-like 3
TMOD1	tropomodulin 1
HS3ST6	heparan sulfate-glucosamine 3-sulfotransferase 6
COPG2	coatomer protein complex subunit gamma 2
LINC00333	long intergenic non-protein coding RNA 333
KRT2	keratin 2
TRIM10	tripartite motif containing 10
SLAMF8	SLAM family member 8
GPR114	adhesion G protein-coupled receptor G5
LAMC2	laminin subunit gamma 2
TXLNB	taxilin beta
GNAS−AS1	GNAS antisense RNA 1
LOC341056	SUMO1 activating enzyme subunit 1 pseudogene
THNSL2	threonine synthase like 2
MYH14	myosin, heavy chain 14, non-muscle
DPP6	dipeptidyl peptidase like 6
PEX6	peroxisomal biogenesis factor 6
GMCL1P1	germ cell-less, spermatogenesis associated 1 pseudogene 1
FTCD	formimidoyltransferase cyclodeaminase
HEATR4	HEAT repeat containing 4
YBEY	ybeY metallopeptidase (putative)
ZNF578	zinc finger protein 578
RANBP3L	RAN binding protein 3 like
CLEC10A	C-type lectin domain family 10 member A
ALDH8A1	aldehyde dehydrogenase 8 family member A1
PSORS1C2	psoriasis susceptibility 1 candidate 2
MUC21	mucin 21, cell surface associated
LRRC61	leucine rich repeat containing 61
ADAMTS16	ADAM metallopeptidase with thrombospondin type 1 motif 16
PDE2A	phosphodiesterase 2A
TMEM132D	transmembrane protein 132D
HTR7	5-hydroxytryptamine receptor 7
LOC100505806	SNHG18 small nucleolar RNA host gene 18
TMEM132B	transmembrane protein 132B
FGF14−IT1	FGF14 intronic transcript 1
GRID1	glutamate ionotropic receptor delta type subunit 1
KIAA1324L	KIAA1324-like
FGF14	fibroblast growth factor 14
SLC25A21	solute carrier family 25 member 21
HS3ST4	heparan sulfate-glucosamine 3-sulfotransferase 4
CHST1	carbohydrate sulfotransferase 1
NPR3	natriuretic peptide receptor 3
SPI1	Spi-1 proto-oncogene
FAM18A	trans-golgi network vesicle protein 23 homolog A
RCAN3	RCAN family member 3
KCNA4	potassium voltage-gated channel subfamily A member 4
C6orf132	chromosome 6 open reading frame 132
MSX1	msh homeobox 1
MGST2	microsomal glutathione S-transferase 2
CADM2	cell adhesion molecule 2
KL	klotho
GGTA1P	glycoprotein, alpha-galactosyltransferase 1 pseudogene
LOC387647	PTCHD3P1 patched domain containing 3 pseudogene 1
LOC647946	MIR924 host gene
C6orf25	chromosome 6 open reading frame 25
VAX2	ventral anterior homeobox 2
MBP	myelin basic protein
ANKLE1	ankyrin repeat and LEM domain containing 1
FGF1	fibroblast growth factor 1
TNFRSF10D	tumor necrosis factor receptor superfamily member 10d
ARHGAP22	Rho GTPase activating protein 22
SFMBT2	Scm-like with four mbt domains 2
PCSK9	proprotein convertase subtilisin/kexin type 9
ODZ4	teneurin transmembrane protein 4
ANKH	ANKH inorganic pyrophosphate transport regulator
PLA2G4A	phospholipase A2 group IVA
CLEC5A	C-type lectin domain family 5 member A
EVC2	EvC ciliary complex subunit 2
RIC3	RIC3 acetylcholine receptor chaperone
CNNM1	cyclin and CBS domain divalent metal cation transport mediator 1

## Sheet: iPS MA genes
LCN10	lipocalin 10
SYCP2L	synaptonemal complex protein 2 like
FAM71F1	family with sequence similarity 71 member F1
LRRTM4	leucine rich repeat transmembrane neuronal 4
BBOX1	gamma-butyrobetaine hydroxylase 1
LOC441204	uncharacterized LOC441204
AHSG	alpha-2-HS-glycoprotein
COLEC11	collectin subfamily member 11
GRID2	glutamate ionotropic receptor delta type subunit 2
GALNT3	polypeptide N-acetylgalactosaminyltransferase 3
TRDN	triadin
ARMS2	age-related maculopathy susceptibility 2
OR2D3	olfactory receptor family 2 subfamily D member 3
XKR9	XK related 9
CLUL1	clusterin like 1
CCDC67	coiled-coil domain containing 67
TAG	long intergenic non-protein coding RNA 1194
MAPT−AS1	contactin 2
ERG	v-ets avian erythroblastosis virus E26 oncogene homolog
LOC91948	long intergenic non-protein coding RNA 923
LOC283867	long intergenic non-protein coding RNA 922
LBP	lipopolysaccharide binding protein
LUZP2	leucine zipper protein 2
LGALS17A	Charcot-Leyden crystal protein pseudogene
ZNF560	zinc finger protein 560
NPFFR2	neuropeptide FF receptor 2
PKIB	protein kinase (cAMP-dependent, catalytic) inhibitor beta
PTCHD3	patched domain containing 3
LOC401164	SUMO1 activating enzyme subunit 1 pseudogene
LOC341056	SUMO1 activating enzyme subunit 1 pseudogene
THNSL2	threonine synthase like 2
PDE2A	phosphodiesterase 2A
LOC387647	PTCHD3P1 patched domain containing 3 pseudogene 1
PAPOLB	poly(A) polymerase beta
GPR114	adhesion G protein-coupled receptor G5
DPP6	dipeptidyl peptidase like 6
SLAMF8	SLAM family member 8
TRIM10	tripartite motif containing 10
KRT2	keratin 2
ZNF578	zinc finger protein 578
GMCL1P1	germ cell-less, spermatogenesis associated 1 pseudogene 1
PEX6	peroxisomal biogenesis factor 6
LRRC61	leucine rich repeat containing 61
HS3ST6	heparan sulfate-glucosamine 3-sulfotransferase 6
HTR7	5-hydroxytryptamine receptor 7
LOC647946	formimidoyltransferase cyclodeaminase
FTCD	HEAT repeat containing 4
HEATR4	ybeY metallopeptidase (putative)
YBEY	myosin, heavy chain 14, non-muscle
MYH14	myosin, heavy chain 7B, cardiac muscle, beta
TRHR	thyrotropin releasing hormone receptor
CLEC10A	C-type lectin domain family 10 member A
DNAJC15	DnaJ heat shock protein family (Hsp40) member C15
RBFOX1	RNA binding protein, fox-1 homolog 1
TCERG1L	transcription elongation regulator 1 like
CACNB2	calcium voltage-gated channel auxiliary subunit beta 2
DYNC1I2	dynein cytoplasmic 1 intermediate chain 2
PDE4DIP	phosphodiesterase 4D interacting protein
SLCO1C1	solute carrier organic anion transporter family member 1C1
SLITRK6	SLIT and NTRK like family member 6
ZNF528	zinc finger protein 528
LRAT	lecithin retinol acyltransferase (phosphatidylcholine--retinol O-acyltransferase)
DNAJA4	DnaJ heat shock protein family (Hsp40) member A4
GAS7	growth arrest specific 7
MLH3	lysine methyltransferase 2A
LOC100507127	mutL homolog 3
NLRP2	NLR family, pyrin domain containing 2
SORBS2	sorbin and SH3 domain containing 2

## Sheet: NSC MA genes
SELL	selectin L
TRPA1	transient receptor potential cation channel subfamily A member 1
LOC100132891	MSC antisense RNA 1
FBXO32	F-box protein 32
LOC100506025	ISPD antisense RNA 1
COPG2	coatomer protein complex subunit gamma 2
C7orf69	chromosome 7 open reading frame 69
TRIM10	tripartite motif containing 10
HLA−DPA1	major histocompatibility complex, class II, DP alpha 1
PWWP2A	PWWP domain containing 2A
ENAM	enamelin
SLC6A1−AS1	SLC6A1 antisense RNA 1
LHFPL4	lipoma HMGIC fusion partner-like 4
ITGB2	integrin subunit beta 2
PAX8	paired box 8
LOC654433	PAX8 antisense RNA 1
CYS1	cystin 1
CLUL1	clusterin like 1
CBLN2	cerebellin 2 precursor
TEKT1	tektin 1
ITGAE	integrin subunit alpha E
HS3ST6	heparan sulfate-glucosamine 3-sulfotransferase 6
WDR72	WD repeat domain 72
UNC13C	unc-13 homolog C (C. elegans)
DNAJC15	DnaJ heat shock protein family (Hsp40) member C15
KRT2	keratin 2
DPY19L2	dpy-19 like 2
ACSS3	acyl-CoA synthetase short-chain family member 3
LGALS12	lectin, galactoside binding soluble 12
GVINP1	GTPase, very large interferon inducible pseudogene 1
GLYATL2	glycine-N-acyltransferase like 2
FRMPD2	FERM and PDZ domain containing 2
CACNB2	calcium voltage-gated channel auxiliary subunit beta 2
TTC22	tetratricopeptide repeat domain 22
TRIM58	tripartite motif containing 58
SLAMF8	SLAM family member 8
RNASEL	ribonuclease L
PDE4DIP	phosphodiesterase 4D interacting protein
NLRP3	NLR family, pyrin domain containing 3
LOC341056	SUMO1 activating enzyme subunit 1 pseudogene
NLRP2	NLR family, pyrin domain containing 2
THNSL2	threonine synthase like 2
TCERG1L	transcription elongation regulator 1 like
LOC401164	gamma-butyrobetaine hydroxylase 1
BBOX1	gamma-butyrobetaine hydroxylase 1
LOC374443	C-type lectin domain family 2 member D pseudogene
PEX6	peroxisomal biogenesis factor 6
PKIB	protein kinase (cAMP-dependent, catalytic) inhibitor beta
GMCL1P1	germ cell-less, spermatogenesis associated 1 pseudogene 1
PSCA	prostate stem cell antigen
HEATR4	HEAT repeat containing 4
MUC20	mucin 20, cell surface associated
LOC441204	uncharacterized LOC441204
MRI1	methylthioribose-1-phosphate isomerase 1
CAPS2	calcyphosine 2
KIAA0087	KIAA0087
SLC2A1−AS1	SLC2A1 antisense RNA 1
LOC387647	patched domain containing 3 pseudogene 1
XKR9	XK related 9
SLC6A1	solute carrier family 6 member 1
LOC647946	MIR924 host gene
IFITM4P	interferon induced transmembrane protein 4 pseudogene
NPSR1−AS1	NPSR1 antisense RNA 1
RANBP3L	RAN binding protein 3 like
CLEC10A	C-type lectin domain family 10 member A
SPINK5	serine peptidase inhibitor, Kazal type 5
C17orf57	EF-hand calcium binding domain 13
PSMB9	proteasome subunit beta 9
SAV1	salvador family WW domain containing protein 1
TNFRSF10A	tumor necrosis factor receptor superfamily member 10a
FGFR4	fibroblast growth factor receptor 4
C6orf195	long intergenic non-protein coding RNA 1600
HLA−B	major histocompatibility complex, class I, B
VAX2	ventral anterior homeobox 2
CD226	CD226 molecule
HLA−C	major histocompatibility complex, class I, C
LOC100506895	uncharacterized LOC100506895
ST8SIA3	ST8 alpha-N-acetylneuraminate alpha-2,8-sialyltransferase 3
F2	coagulation factor II, thrombin
RAD50	RAD50 double strand break repair protein
SHISA9	shisa family member 9
SPTBN5	spectrin beta, non-erythrocytic 5
FBP2	fructose-bisphosphatase 2
CMBL	carboxymethylenebutenolidase homolog (Pseudomonas)
HSD17B12	hydroxysteroid (17-beta) dehydrogenase 12
DDX25	DEAD-box helicase 25
LOC390858	O-acyltransferase like, pseudogene
EPDR1	ependymin related 1
ZNF204P	zinc finger protein 204, pseudogene
HOXA7	homeobox A7
LMAN1L	lectin, mannose binding 1 like
SLC8A3	solute carrier family 8 member A3
ENPP2	ectonucleotide pyrophosphatase/phosphodiesterase 2
CYP7B1	cytochrome P450 family 7 subfamily B member 1
LOC643401	long intergenic non-protein coding RNA 1021
FAM71E2	family with sequence similarity 71 member E2
RNF212	ring finger protein 212
PRELID2	PRELI domain containing 2
B3GALNT1	beta-1,3-N-acetylgalactosaminyltransferase 1 (globoside blood group)
CNTLN	centlein
FAM101A	family with sequence similarity 101 member A
ISPD	isoprenoid synthase domain containing
HEATR7A	maestro heat like repeat family member 1
TXNRD2	thioredoxin reductase 2
COL14A1	collagen type XIV alpha 1
CTSC	cathepsin C
PLA2G4A	phospholipase A2 group IVA
XKR5	XK related 5
COMT	catechol-O-methyltransferase
OLFM1	olfactomedin 1
ZNF311	zinc finger protein 311
ZNF732	zinc finger protein 732
RNF175	ring finger protein 175
SLC16A14	solute carrier family 16 member 14
DGCR6	DiGeorge syndrome critical region gene 6
NPR3	natriuretic peptide receptor 3
F7	coagulation factor VII
PARP14	poly(ADP-ribose) polymerase family member 14
LOC392232	transient receptor potential cation channel, subfamily A, member 1 pseudogene
PABPC4L	poly(A) binding protein cytoplasmic 4 like
ZNF280D	zinc finger protein 280D
MPV17L	MPV17 mitochondrial inner membrane protein like
IRAK4	interleukin 1 receptor associated kinase 4
FMO4	flavin containing monooxygenase 4
CTSO	cathepsin O
